# Supplementary material for: An effective cytokine adjuvant vaccine induces autologous T-cell response against colon cancer in an animal model
Source: BMC Immunol. 2016 Sep 26;17:31. doi: 10.1186/s12865-016-0172-x (PMC5037582; doi:10.1186/s12865-016-0172-x)

## Supplementary Figure S4

**Fig.S4. IHC staining for CD80, CD86 and CD83 in lymph nodes** The sections of the LN collected at different time intervals from -1d to 23d period (1/per mouse and for 3 mice) from tumor control and treatment group mice, were stained with CD80 (panel A), CD86 (panel B) and CD83 (panel C) antibodies by IHC Kit. The results were observed in (40×10) horizon at time for -1d, 9d, 16d and 23d between tumor group and treatment group which stand for  $p<0.001$ . Bar=50 $\mu$ m.

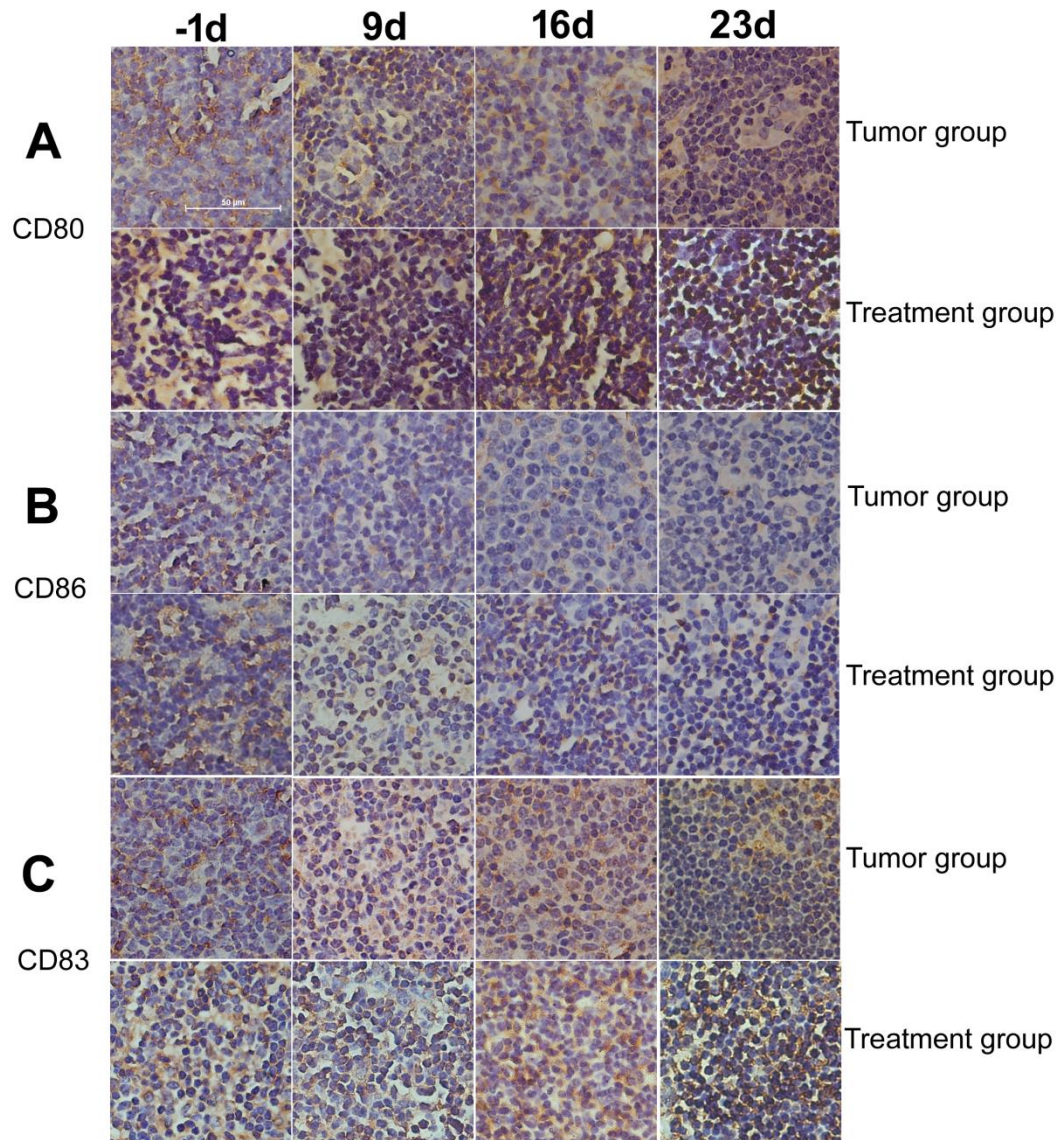

Supplement: Additional file 4: Figure S4. — Provides the pictures for IHC staining for CD80, CD86 and CD83 in lymph nodes. (PDF 445 kb) [file 12865_2016_172_MOESM4_ESM.pdf]
